# Supplementary material for: Development and Validation of a 54K Genome-Wide Liquid SNP Chip Panel by Target Sequencing for Dairy Goat
Source: MDPI journal article supplement (doi:10.3390/genes14051122), 2023-05-22
Supplement: s1 [file s1]

## Supplementary Methods

### **Selective signatures associated with phenotypic traits based on SNPs.**

We compared the 133 commonly selected regions associated with different phenotypes (e.g., production, morphological and physiological traits) by XP-CLR,  $\pi$ -ratio and iHS analyses as well as the 95 commonly selected regions by XP-CLR,  $\pi$ -ratio and HKA analyses with previously mapped QTLs. We found that 30 of the selective sweeps by XP-CLR,  $\pi$ -ratio and iHS and 43 of the selective sweeps by XP-CLR,  $\pi$ -ratio and HKA overlapped with known QTLs<sup>69</sup>, which are associated with a number of traits such as reproduction, milk, growth, meat and carcass, fat deposition in the tails and wool fineness (Supplementary Table S5, Supplementary Data S43 and S44). Specifically, for XP-CLR,  $\pi$ -ratio and iHS, the number of QTLs (shorter than 100 Mb) overlapping for traits such as reproduction, milk, growth, meat and carcass, fat deposition in the tails are 3 (permutation test,  $P < 0.01$ ), 1 (permutation test,  $P < 0.05$ ), 20 (permutation test,  $P < 0.001$ ), 7 (permutation test,  $P < 0.05$ ), respectively (Supplementary Table S5 and Supplementary Data S43). For XP-CLR,  $\pi$ -ratio and HKA, the overlapping numbers of QTLs (shorter than 100 Mb) for the above traits are 1 (permutation test,  $P < 0.001$ ), 4 (permutation test,  $P < 0.001$ ), 32 (permutation test,  $P < 0.001$ ) and 2 (permutation test,  $P < 0.05$ ), respectively (Supplementary Table S5 and Supplementary Data S44).
