# Supplementary material for: Development and Validation of a 54K Genome-Wide Liquid SNP Chip Panel by Target Sequencing for Dairy Goat
Source: Genes (Basel). 2023 May 22;14(5):1122. doi: 10.3390/genes14051122 (PMC10218471; doi:10.3390/genes14051122)
Supplement: Supplementary file 1 [file genes-14-01122-s001.zip]

Archive with 4 entries (4 files):
- Supplementary_Methods.pdf
- Supplementary_TableS1.xlsx
- Supplementary_TableS2.xlsx
- Supplementary_TableS3.xlsx
