# Supplementary material for: Development and Validation of a 54K Genome-Wide Liquid SNP Chip Panel by Target Sequencing for Dairy Goat
Source: Genes (Basel). 2023 May 22;14(5):1122. doi: 10.3390/genes14051122 (PMC10218471; doi:10.3390/genes14051122)
Supplement: Supplementary file 1 [file genes-14-01122-s001.zip › Supplementary_TableS1.xlsx]

## Sheet: Sheet1
Table S1 Reads mapping ratios of 200 goats.
Sample ID	Total reads	Mapped reads	Mapped ratio(%)	Properly mapped	Properly mapped ratio(%)	Dup ratio(%)
23028651D	20250449	20243260	99.96	19091320	94.45	4.55
23028652D	19772427	19763324	99.95	18761002	95.08	3.55
23028653D	17981679	17974798	99.96	17122624	95.43	3.89
23028654D	17161207	17154879	99.96	16530544	96.52	3.19
23028655D	17515181	17506683	99.95	16562798	94.78	3.88
23028656D	17512365	17507626	99.97	16573446	94.86	3.65
23028657D	20260804	20253193	99.96	19423066	96.06	3.71
23028658D	19008646	19002872	99.97	17990606	94.82	3.37
23028659D	15689071	15683236	99.96	14419242	92.23	6.31
23028660D	11058269	11052568	99.95	10521946	95.42	1.92
23028661D	16511590	16506399	99.97	15620008	94.86	3.61
23028662D	18080130	18074919	99.97	17161948	95.13	3.51
23028663D	15993554	15989673	99.98	15223872	95.36	3.39
23028664D	14745277	14740869	99.97	14051012	95.53	3.28
23028665D	14069145	14065256	99.97	13552538	96.53	2.91
23028666D	21251077	21245623	99.97	20144962	95.01	4.41
23028667D	17163216	17159246	99.98	16152330	94.32	4.52
23028668D	16011548	16006560	99.97	15303182	95.82	3.2
23028669D	15208374	15204655	99.98	14588834	96.09	3.52
23028670D	16747603	16743408	99.97	16008342	95.83	3.91
23028671D	14732377	14727412	99.97	14035222	95.51	3.4
23028672D	15046657	15041991	99.97	14485326	96.49	3.18
23028673D	13264933	13261387	99.97	12744744	96.29	2.77
23028674D	19830950	19806816	99.88	19332966	98.04	7.5
23028675D	18021743	18017536	99.98	17302966	96.23	3.63
23028676D	15266249	15261678	99.97	14789598	97.04	2.93
23028677D	17316911	17311551	99.97	16559216	95.8	3.6
23028678D	22717354	22710825	99.97	21577184	95.24	4.38
23028679D	16818125	16811320	99.96	16118716	96.13	3.05
23028680D	14118150	14114319	99.97	13492044	95.82	3.68
23028681D	17770530	17765157	99.97	17080830	96.35	3.42
23028682D	14617630	14610273	99.95	13700050	94.02	6.78
23028683D	16961931	16956383	99.97	16087022	95.08	3.85
23028684D	16361417	16349384	99.93	15913714	97.7	4.95
23028685D	12407949	12404803	99.97	11875628	95.95	2.91
23028686D	11536889	11532933	99.97	10661158	92.67	3.5
23028687D	12660747	12657260	99.97	12029686	95.26	2.77
23028688D	11170119	11165975	99.96	10589976	95.07	2.78
23028689D	9633847	9630509	99.97	9088090	94.62	2.72
23028690D	14035512	14031246	99.97	13404062	95.73	2.76
23028691D	15300373	15295454	99.97	14581670	95.55	3.06
23028692D	9266781	9263112	99.96	8864970	95.96	2.16
23028693D	11239623	11235795	99.97	10663384	95.1	2.36
23028694D	10767538	10764390	99.97	10211800	95.06	2.68
23028695D	12534862	12529225	99.96	12130032	97.03	2.73
23028696D	13741059	13737447	99.97	13108892	95.63	3.09
23028697D	12424197	12420115	99.97	11907900	96.07	2.54
23028698D	12636756	12632902	99.97	11670266	92.6	2.64
23028699D	12626272	12621553	99.96	12116714	96.24	2.57
23028700D	15320438	15316706	99.98	14881728	97.4	2.97
23028701D	11864620	11861282	99.97	11181294	94.51	2.8
23028702D	13458273	13453760	99.97	12651970	94.63	2.87
23028703D	14862663	14856404	99.96	14322280	96.67	2.8
23028704D	11740369	11737460	99.98	11216114	95.78	2.48
23028705D	9388331	9384992	99.96	8918180	95.24	2.1
23028706D	15818453	15813333	99.97	15070520	95.5	2.61
23028707D	13767664	13758271	99.93	13322460	97.02	2.24
23028708D	10664158	10660896	99.97	9979448	93.85	3.84
23028709D	14488462	14485186	99.98	13781094	95.4	3.31
23028710D	17733163	17727786	99.97	16695180	94.43	4.13
23028711D	9663546	9660495	99.97	8982198	93.23	3.29
23028712D	11453451	11446812	99.94	10861196	95.1	2.67
23028713D	11725571	11722750	99.98	10950274	93.64	3.33
23028714D	12169091	12166318	99.98	11688176	96.19	2.39
23028715D	12889018	12885757	99.97	12363588	96.14	2.48
23028716D	11537161	11534401	99.98	11056962	96.08	2.82
23028717D	13628553	13624375	99.97	12899484	94.91	3.01
23028718D	12916570	12906419	99.92	12199606	94.75	2.81
23028719D	14005721	14001297	99.97	13382308	95.78	3.46
23028720D	14674864	14670781	99.97	13896262	94.93	4.1
23028721D	15455119	15450434	99.97	14558426	94.45	3.32
23028722D	16717569	16711871	99.97	15518648	93.07	3.85
23028723D	17480910	17475011	99.97	16031934	91.99	4.89
23028724D	15760352	15756032	99.97	15175266	96.52	3.54
23028725D	23275556	23269766	99.98	22167794	95.55	4.33
23028726D	16622073	16618069	99.98	15700008	94.7	3.99
23028727D	13496542	13492351	99.97	12687292	94.25	4.31
23028728D	17608233	17602578	99.97	16864296	96	3.67
23028729D	18775553	18769911	99.97	18123594	96.68	3.28
23028730D	21710743	21703549	99.97	20614436	95.17	3.94
23028731D	17611511	17607082	99.97	16762666	95.39	4
23028732D	14872767	14868333	99.97	14064262	94.8	4
23028733D	15385463	15378595	99.96	14788774	96.43	3.54
23028734D	15426213	15420503	99.96	14543300	94.53	3.37
23028735D	15410779	15406563	99.97	14628058	95.16	3.75
23028736D	13150856	13147340	99.97	12449302	94.9	3.83
23028737D	17889171	17884435	99.97	17199270	96.38	3.54
23028738D	18931330	18926344	99.97	17841648	94.5	4.09
23028739D	18744822	18739708	99.97	17836422	95.39	4.02
23028740D	14923576	14919674	99.97	14320852	96.19	3.81
23028741D	18128438	18122135	99.97	17149786	94.86	4.23
23028742D	18933397	18926497	99.96	17970650	95.15	4.28
23028743D	14554680	14551106	99.98	13903420	95.74	4.14
23028744D	11545383	11541904	99.97	11080006	96.19	2.82
23028745D	18272491	18263003	99.95	17033006	93.49	5.27
23028746D	13914735	13911063	99.97	13091152	94.3	3.82
23028747D	19000060	18995732	99.98	18500718	97.53	3.77
23028748D	16418324	16413455	99.97	15858002	96.74	3.51
23028749D	15665824	15662005	99.98	15048828	96.23	3.44
23028750D	19641247	19635347	99.97	19049436	97.13	3.63
23028751D	14817022	14812669	99.97	13999830	94.67	3.59
23028752D	15996343	15991875	99.97	15299308	95.79	3.24
23028753D	12474647	12469877	99.96	11629424	93.44	4.26
23028754D	14117408	14113915	99.98	13516268	95.91	3.13
23028755D	7317774	7313057	99.94	6716562	92.46	13.12
23028756D	9594167	9590732	99.96	9301356	97.09	2.14
23028757D	11465828	11461772	99.96	10850744	94.8	3.2
23028758D	14079460	14074365	99.96	13480166	95.9	2.53
23028759D	12608680	12597040	99.91	11807590	93.82	3.01
23028760D	9496453	9493814	99.97	9122122	96.22	2.67
23028761D	13659453	13655581	99.97	13062202	95.8	2.86
23028762D	14914041	14909562	99.97	14481886	97.28	2.85
23028763D	13097603	13093419	99.97	12437042	95.13	2.85
23028764D	9605936	9603103	99.97	9091258	94.82	2.58
23028765D	12056216	12053150	99.97	11371720	94.48	3
23028766D	13966762	13961087	99.96	13523026	96.98	2.7
23028767D	10192830	10187720	99.95	9047204	88.99	3.06
23028768D	11491830	11487649	99.96	10853524	94.62	2.92
23028769D	13517903	13513683	99.97	12885014	95.49	3.11
23028770D	15168637	15163471	99.97	14843728	97.99	2.83
23028771D	13593922	13590599	99.98	13224542	97.42	2.71
23028772D	11750795	11742435	99.93	10973646	93.59	3.49
23028773D	13132263	13128429	99.97	12786912	97.51	3.02
23028774D	14208289	14203672	99.97	13650734	96.26	2.7
23028775D	13579472	13574820	99.97	13009666	95.96	3.05
23028776D	10874551	10871259	99.97	10587082	97.5	2.86
23028777D	12860363	12856568	99.97	12269864	95.57	3.15
23028778D	14495911	14491096	99.97	14013868	96.82	2.46
23028779D	12755299	12751517	99.97	12271126	96.37	2.83
23028780D	11797024	11792436	99.96	11243174	95.47	2.95
23028781D	11508952	11506459	99.98	10946494	95.26	2.97
23028782D	12654160	12651062	99.98	11962118	94.7	3.35
23028783D	12244927	12241986	99.98	11441026	93.62	3.19
23028784D	10515792	10511903	99.96	9987376	95.13	2.29
23028785D	13136437	13131211	99.96	12313440	93.91	3.17
23028786D	14947225	14943470	99.97	14608846	97.86	3.09
23028787D	7364196	7362208	99.97	7088594	96.41	1.43
23028788D	7157325	7154969	99.97	6878514	96.25	1.52
23028789D	5172455	5170922	99.97	4923596	95.36	1.25
23028790D	6764083	6761835	99.97	6297702	93.3	1.7
23028791D	5845930	5842858	99.95	4986970	85.66	2.2
23028792D	8647648	8644485	99.96	8382948	97.1	1.72
23028793D	8659421	8656118	99.96	8132554	94.12	2.06
23028794D	8058321	8055706	99.97	7736578	96.17	1.69
23028795D	9497729	9493519	99.96	9187382	96.91	1.72
23028796D	7095625	7092687	99.96	6679144	94.29	1.73
23028797D	8253206	8250702	99.97	7937000	96.32	1.86
23028798D	7178876	7175453	99.95	6586202	91.94	1.88
23028799D	8113701	8111743	99.98	7762752	95.84	1.84
23028800D	5612731	5611394	99.98	5361958	95.69	1.26
23028801D	7744106	7741886	99.97	7349144	95.08	1.86
23028802D	8722687	8719686	99.97	8390442	96.35	1.67
23028803D	7854277	7851230	99.96	7583024	96.69	1.64
23028804D	6819218	6816847	99.97	6375870	93.69	1.73
23028820D	6500142	6497840	99.96	6193852	95.43	1.41
23028821D	7228272	7225272	99.96	6738916	93.37	1.59
23028822D	7684828	7682110	99.96	7355208	95.88	1.38
23028823D	6388836	6386247	99.96	6030520	94.54	1.16
23028824D	8271597	8269162	99.97	7946172	96.21	1.53
23028825D	7294212	7290847	99.95	6968638	95.7	1.5
23028826D	8163238	8161033	99.97	7949864	97.53	1.67
23028827D	6814161	6812187	99.97	6543382	96.18	1.46
23028828D	8139462	8136862	99.97	7837620	96.44	1.55
23028829D	7556475	7553383	99.96	7218236	95.69	1.95
23028830D	7668079	7662847	99.93	7291428	95.26	1.88
23028831D	7287176	7284901	99.97	6938930	95.34	1.73
23028832D	6835960	6833178	99.96	6676810	97.82	1.31
23028833D	7693441	7686936	99.92	7453700	97.04	2.15
23028834D	7546936	7543071	99.95	6972824	92.59	2.07
23028835D	5865545	5861175	99.93	5333452	91.31	3.01
23028836D	21856503	21850811	99.97	20609354	94.47	4.13
23028837D	25601151	25590988	99.96	24254554	94.89	4.6
23028838D	19265055	19258497	99.97	18141018	94.36	4.63
23028839D	24407811	24402161	99.98	23259834	95.46	5.28
23028840D	27262297	27246527	99.94	25938244	95.32	4.7
23028841D	26630051	26620908	99.97	25544664	96.1	4.09
23028842D	30087200	30080332	99.98	29355128	97.71	5.56
23028843D	22492900	22485569	99.97	21664156	96.53	3.89
23028844D	24018814	24011043	99.97	23389030	97.62	3.62
23028845D	16006486	16002485	99.98	15054298	94.28	3.53
23028846D	23018074	23011931	99.97	21805694	95	4.59
23028847D	25766722	25759481	99.97	24899542	96.87	3.72
23028848D	25899299	25886777	99.95	25205024	97.55	4.29
23028849D	23038502	23033076	99.98	22306046	97.04	3.85
23028850D	28674808	28662052	99.96	27605814	96.47	3.81
21425958D	23435119	23427986	99.97	23117484	98.83	3.03
21425990D	20824180	20819584	99.98	20541436	98.83	3.63
21425931D	24561911	24557310	99.98	24026382	97.98	3.67
21425938D	23198441	23194165	99.98	22846808	98.65	3.86
21425985D	20089159	20083350	99.97	19849044	98.99	3.75
21425968D	23263422	23257580	99.97	22973204	98.92	3.39
21425970D	23501285	23494652	99.97	23214062	98.95	3.46
21425982D	28478784	28471888	99.98	28114968	98.9	3.92
21425936D	28471690	28462598	99.97	27700608	97.46	3.67
21425953D	17354240	17349828	99.97	17106074	98.75	3.1
21425973D	21580434	21574704	99.97	21287946	98.81	3.06
21425940D	19986694	19981584	99.97	19710476	98.8	3.09
21425929D	30489097	30482216	99.98	29859740	98.1	4.52
21425981D	23769697	23762469	99.97	23422848	98.71	2.99
21425946D	24840034	24832215	99.97	24532138	98.93	3.21
