# Supplementary material for: Development and Validation of a 54K Genome-Wide Liquid SNP Chip Panel by Target Sequencing for Dairy Goat
Source: Genes (Basel). 2023 May 22;14(5):1122. doi: 10.3390/genes14051122 (PMC10218471; doi:10.3390/genes14051122)
Supplement: Supplementary file 1 [file genes-14-01122-s001.zip › Supplementary_TableS2.xlsx]

## Sheet: Sheet1
Table S2 Capture ratios above dp0, dp5, dp10, dp15, and dp20 in 200 goats, respectively.
Sample ID	dp0	dp0 %	dp5	dp5 %	dp10	dp10 %	dp15	dp15 %	dp20	dp20 %
21425929D	54068	99.78	53804	99.29	53675	99.05	53609	98.93	53537	98.8
21425931D	54057	99.76	53746	99.18	53606	98.93	53522	98.77	53414	98.57
21425936D	54057	99.76	53716	99.13	53594	98.9	53503	98.74	53438	98.62
21425938D	53962	99.58	53708	99.11	53617	98.95	53544	98.81	53464	98.66
21425940D	54046	99.74	53724	99.14	53593	98.9	53483	98.7	53356	98.46
21425946D	54078	99.8	53744	99.18	53608	98.93	53484	98.7	53353	98.46
21425953D	54028	99.7	53712	99.12	53588	98.89	53443	98.63	53300	98.36
21425958D	54038	99.72	53738	99.17	53591	98.9	53490	98.71	53365	98.48
21425968D	54052	99.75	53705	99.11	53588	98.89	53499	98.73	53388	98.52
21425970D	54027	99.7	53699	99.1	53568	98.86	53466	98.67	53375	98.5
21425973D	54040	99.73	53708	99.11	53564	98.85	53460	98.66	53350	98.45
21425981D	54068	99.78	53757	99.2	53610	98.93	53495	98.72	53404	98.55
21425982D	54075	99.79	53793	99.27	53682	99.07	53594	98.9	53505	98.74
21425985D	54027	99.7	53718	99.13	53597	98.91	53499	98.73	53397	98.54
21425990D	54005	99.66	53712	99.12	53577	98.87	53471	98.68	53343	98.44
23028651D	53971	99.6	53610	98.93	53442	98.62	53338	98.43	53220	98.21
23028652D	54061	99.77	53692	99.08	53501	98.73	53328	98.41	53178	98.14
23028653D	53968	99.59	53595	98.91	53445	98.63	53298	98.36	53145	98.08
23028654D	53989	99.63	53560	98.84	53369	98.49	53190	98.16	52944	97.7
23028655D	54000	99.65	53593	98.9	53432	98.6	53280	98.32	53123	98.03
23028656D	53946	99.55	53559	98.84	53401	98.55	53254	98.28	53072	97.94
23028657D	54006	99.66	53571	98.86	53401	98.55	53290	98.34	53148	98.08
23028658D	53962	99.58	53594	98.9	53464	98.66	53329	98.41	53179	98.14
23028659D	53965	99.59	53564	98.85	53374	98.5	53206	98.19	53020	97.84
23028660D	53874	99.42	53433	98.61	53105	98	52721	97.29	52176	96.29
23028661D	53955	99.57	53589	98.89	53408	98.56	53252	98.27	53059	97.92
23028662D	53945	99.55	53548	98.82	53372	98.49	53185	98.15	52976	97.76
23028663D	53926	99.52	53585	98.89	53437	98.61	53297	98.36	53141	98.07
23028664D	53946	99.55	53509	98.75	53328	98.41	53085	97.96	52815	97.47
23028665D	53966	99.59	53525	98.78	53304	98.37	53051	97.9	52770	97.38
23028666D	54030	99.71	53641	98.99	53491	98.71	53364	98.48	53226	98.22
23028667D	53948	99.56	53571	98.86	53416	98.58	53283	98.33	53130	98.05
23028668D	53965	99.59	53541	98.81	53322	98.4	53099	97.99	52838	97.51
23028669D	53916	99.5	53528	98.78	53350	98.45	53172	98.13	52979	97.77
23028670D	53980	99.62	53574	98.87	53394	98.53	53224	98.22	53052	97.9
23028671D	53916	99.5	53531	98.79	53344	98.44	53155	98.09	52914	97.65
23028672D	53927	99.52	53491	98.71	53308	98.38	53117	98.02	52871	97.57
23028673D	53917	99.5	53525	98.78	53314	98.39	53069	97.93	52807	97.45
23028674D	54053	99.75	53732	99.16	53570	98.86	53427	98.6	53318	98.39
23028675D	53908	99.48	53567	98.85	53419	98.58	53289	98.34	53149	98.08
23028676D	53929	99.52	53539	98.8	53340	98.44	53133	98.05	52917	97.65
23028677D	53952	99.56	53570	98.86	53402	98.55	53254	98.28	53081	97.96
23028678D	54021	99.69	53629	98.97	53486	98.7	53362	98.48	53255	98.28
23028679D	54003	99.66	53533	98.79	53314	98.39	53111	98.01	52886	97.6
23028680D	53924	99.51	53507	98.74	53279	98.32	53077	97.95	52815	97.47
23028681D	54007	99.67	53585	98.89	53387	98.52	53224	98.22	53034	97.87
23028682D	53925	99.51	53550	98.82	53371	98.49	53203	98.18	53018	97.84
23028683D	53975	99.61	53588	98.89	53423	98.59	53249	98.27	53064	97.93
23028684D	53998	99.65	53599	98.91	53413	98.57	53244	98.26	53087	97.97
23028685D	53875	99.42	53476	98.69	53269	98.3	53035	97.87	52745	97.34
23028686D	53874	99.42	53512	98.75	53284	98.33	53045	97.89	52763	97.37
23028687D	53981	99.62	53576	98.87	53321	98.4	53054	97.91	52765	97.37
23028688D	53925	99.51	53476	98.69	53229	98.23	52909	97.64	52492	96.87
23028689D	53853	99.38	53420	98.58	53165	98.11	52813	97.46	52331	96.57
23028690D	53974	99.61	53565	98.85	53357	98.47	53149	98.08	52883	97.59
23028691D	53899	99.47	53532	98.79	53328	98.41	53081	97.96	52820	97.48
23028692D	53836	99.35	53370	98.49	53025	97.85	52570	97.01	51875	95.73
23028693D	53881	99.43	53458	98.65	53190	98.16	52885	97.6	52465	96.82
23028694D	53821	99.32	53440	98.62	53190	98.16	52943	97.7	52586	97.04
23028695D	53903	99.47	53479	98.69	53241	98.25	53002	97.81	52654	97.17
23028696D	53880	99.43	53527	98.78	53339	98.43	53138	98.06	52898	97.62
23028697D	53941	99.54	53510	98.75	53246	98.26	52966	97.74	52606	97.08
23028698D	53910	99.49	53492	98.72	53282	98.33	53029	97.86	52714	97.28
23028699D	53923	99.51	53482	98.7	53283	98.33	53034	97.87	52753	97.35
23028700D	53958	99.58	53531	98.79	53353	98.46	53179	98.14	52986	97.78
23028701D	53915	99.5	53484	98.7	53268	98.3	53012	97.83	52653	97.17
23028702D	53928	99.52	53500	98.73	53295	98.35	53040	97.88	52688	97.23
23028703D	53969	99.6	53516	98.76	53299	98.36	53093	97.98	52831	97.5
23028704D	53847	99.37	53449	98.64	53220	98.21	52980	97.77	52650	97.16
23028705D	53863	99.4	53350	98.45	53038	97.88	52568	97.01	51769	95.54
23028706D	53995	99.64	53531	98.79	53332	98.42	53079	97.95	52801	97.44
23028707D	53948	99.56	53465	98.67	53204	98.18	52889	97.6	52471	96.83
23028708D	53882	99.44	53459	98.65	53237	98.24	52966	97.74	52625	97.12
23028709D	53892	99.45	53527	98.78	53367	98.48	53199	98.17	53005	97.82
23028710D	54006	99.66	53590	98.9	53415	98.57	53262	98.29	53119	98.03
23028711D	53869	99.41	53416	98.58	53142	98.07	52830	97.49	52387	96.68
23028712D	53917	99.5	53459	98.65	53189	98.16	52878	97.58	52472	96.83
23028713D	53913	99.49	53473	98.68	53206	98.19	52967	97.75	52626	97.12
23028714D	53869	99.41	53506	98.74	53284	98.33	53031	97.86	52752	97.35
23028715D	53909	99.49	53490	98.71	53247	98.26	52985	97.78	52703	97.26
23028716D	53861	99.4	53410	98.56	53158	98.1	52883	97.59	52533	96.95
23028717D	53928	99.52	53515	98.76	53300	98.36	53075	97.95	52809	97.46
23028718D	53931	99.53	53529	98.78	53310	98.38	53027	97.86	52710	97.27
23028719D	53918	99.5	53555	98.83	53375	98.5	53201	98.18	52998	97.8
23028720D	53936	99.53	53516	98.76	53358	98.47	53181	98.14	53016	97.84
23028721D	53961	99.58	53553	98.83	53365	98.48	53186	98.15	52974	97.76
23028722D	53974	99.61	53563	98.85	53416	98.58	53295	98.35	53128	98.04
23028723D	53924	99.51	53574	98.87	53430	98.6	53325	98.41	53199	98.17
23028724D	53941	99.54	53547	98.82	53370	98.49	53192	98.16	53003	97.81
23028725D	53954	99.57	53588	98.89	53445	98.63	53303	98.37	53165	98.11
23028726D	53966	99.59	53575	98.87	53408	98.56	53248	98.27	53049	97.9
23028727D	53949	99.56	53560	98.84	53379	98.51	53184	98.15	52955	97.72
23028728D	53974	99.61	53566	98.85	53417	98.58	53247	98.26	53069	97.93
23028729D	53989	99.63	53591	98.9	53424	98.59	53262	98.29	53062	97.92
23028730D	53990	99.63	53622	98.96	53488	98.71	53360	98.47	53228	98.23
23028731D	53927	99.52	53540	98.8	53413	98.57	53293	98.35	53171	98.12
23028732D	53925	99.51	53553	98.83	53386	98.52	53232	98.24	53071	97.94
23028733D	53941	99.54	53557	98.84	53392	98.53	53203	98.18	53004	97.82
23028734D	53993	99.64	53554	98.83	53363	98.48	53156	98.1	52924	97.67
23028735D	53959	99.58	53554	98.83	53382	98.51	53209	98.19	53032	97.87
23028736D	53906	99.48	53549	98.82	53358	98.47	53154	98.09	52936	97.69
23028737D	53970	99.6	53575	98.87	53405	98.56	53243	98.26	53062	97.92
23028738D	53953	99.57	53566	98.85	53430	98.6	53316	98.39	53171	98.12
23028739D	53981	99.62	53597	98.91	53459	98.65	53337	98.43	53206	98.19
23028740D	53909	99.49	53555	98.83	53401	98.55	53260	98.29	53079	97.95
23028741D	53987	99.63	53605	98.92	53465	98.67	53337	98.43	53205	98.19
23028742D	54022	99.69	53637	98.98	53504	98.74	53355	98.46	53218	98.21
23028743D	53968	99.59	53575	98.87	53396	98.54	53174	98.13	52927	97.67
23028744D	53952	99.56	53506	98.74	53261	98.29	53020	97.84	52683	97.22
23028745D	53984	99.62	53538	98.8	53368	98.49	53250	98.27	53110	98.01
23028746D	53928	99.52	53546	98.82	53388	98.52	53236	98.24	53015	97.84
23028747D	53988	99.63	53622	98.96	53511	98.75	53404	98.55	53294	98.35
23028748D	53977	99.61	53614	98.94	53459	98.65	53334	98.42	53172	98.13
23028749D	53981	99.62	53608	98.93	53446	98.63	53289	98.34	53120	98.03
23028750D	53984	99.62	53605	98.92	53469	98.67	53343	98.44	53213	98.2
23028751D	54001	99.65	53600	98.91	53422	98.59	53249	98.27	53049	97.9
23028752D	53982	99.62	53620	98.95	53444	98.63	53323	98.4	53156	98.1
23028753D	53939	99.54	53561	98.84	53385	98.52	53197	98.17	52997	97.8
23028754D	53978	99.61	53590	98.9	53423	98.59	53272	98.31	53084	97.96
23028755D	53781	99.25	53290	98.34	52796	97.43	51924	95.82	50413	93.03
23028756D	53879	99.43	53468	98.67	53245	98.26	52930	97.68	52476	96.84
23028757D	53926	99.52	53570	98.86	53372	98.49	53139	98.06	52894	97.61
23028758D	53979	99.61	53575	98.87	53385	98.52	53192	98.16	52974	97.76
23028759D	53990	99.63	53620	98.95	53448	98.63	53286	98.34	53074	97.94
23028760D	53862	99.4	53511	98.75	53303	98.37	53000	97.81	52595	97.06
23028761D	54021	99.69	53584	98.89	53392	98.53	53175	98.13	52942	97.7
23028762D	54014	99.68	53618	98.95	53455	98.65	53295	98.35	53126	98.04
23028763D	53960	99.58	53569	98.86	53377	98.5	53171	98.12	52951	97.72
23028764D	53919	99.5	53516	98.76	53278	98.32	52987	97.78	52633	97.13
23028765D	53921	99.51	53537	98.8	53363	98.48	53152	98.09	52903	97.63
23028766D	53947	99.56	53570	98.86	53400	98.55	53231	98.23	53022	97.85
23028767D	53905	99.48	53519	98.77	53315	98.39	53053	97.91	52723	97.3
23028768D	53902	99.47	53552	98.83	53368	98.49	53182	98.14	52945	97.71
23028769D	53933	99.53	53580	98.88	53420	98.58	53244	98.26	53062	97.92
23028770D	54001	99.65	53566	98.85	53370	98.49	53224	98.22	53044	97.89
23028771D	53923	99.51	53579	98.88	53402	98.55	53233	98.24	53017	97.84
23028772D	53995	99.64	53557	98.84	53357	98.47	53150	98.08	52852	97.53
23028773D	53889	99.45	53536	98.8	53382	98.51	53240	98.25	53071	97.94
23028774D	54004	99.66	53569	98.86	53361	98.47	53164	98.11	52892	97.61
23028775D	53974	99.61	53572	98.86	53389	98.53	53198	98.17	52996	97.8
23028776D	53951	99.56	53525	98.78	53306	98.37	53062	97.92	52710	97.27
23028777D	53917	99.5	53547	98.82	53393	98.53	53246	98.26	53051	97.9
23028778D	53952	99.56	53490	98.71	53288	98.34	53105	98	52847	97.53
23028779D	53966	99.59	53576	98.87	53400	98.55	53217	98.21	53001	97.81
23028780D	53991	99.64	53536	98.8	53353	98.46	53123	98.03	52842	97.52
23028781D	53846	99.37	53543	98.81	53356	98.46	53190	98.16	52973	97.76
23028782D	53896	99.46	53572	98.86	53408	98.56	53255	98.28	53057	97.91
23028783D	53922	99.51	53506	98.74	53317	98.39	53105	98	52864	97.56
23028784D	53900	99.47	53443	98.63	53219	98.21	52945	97.71	52539	96.96
23028785D	53990	99.63	53609	98.93	53426	98.59	53264	98.29	53056	97.91
23028786D	53939	99.54	53594	98.9	53455	98.65	53337	98.43	53153	98.09
23028787D	53823	99.33	53400	98.55	53030	97.86	52530	96.94	51662	95.34
23028788D	53878	99.43	53427	98.6	52976	97.76	52344	96.6	51240	94.56
23028789D	53809	99.3	53234	98.24	52517	96.92	51009	94.13	48065	88.7
23028790D	53820	99.32	53400	98.55	53029	97.86	52356	96.62	51214	94.51
23028791D	53798	99.28	53294	98.35	52740	97.33	51608	95.24	49211	90.82
23028792D	53877	99.43	53505	98.74	53256	98.28	52908	97.64	52439	96.77
23028793D	53919	99.5	53478	98.69	53194	98.17	52771	97.39	52170	96.28
23028794D	53918	99.5	53474	98.68	53179	98.14	52766	97.38	52130	96.2
23028795D	53901	99.47	53444	98.63	53106	98	52686	97.23	52165	96.27
23028796D	53854	99.38	53436	98.61	53076	97.95	52560	97	51737	95.48
23028797D	53873	99.42	53476	98.69	53189	98.16	52849	97.53	52341	96.59
23028798D	53848	99.37	53367	98.48	52909	97.64	52133	96.21	50732	93.62
23028799D	53808	99.3	53457	98.65	53195	98.17	52866	97.56	52395	96.69
23028800D	53803	99.29	53284	98.33	52658	97.18	51575	95.18	49417	91.2
23028801D	53830	99.34	53417	98.58	53077	97.95	52679	97.22	51958	95.88
23028802D	53888	99.45	53467	98.67	53152	98.09	52666	97.19	52026	96.01
23028803D	53845	99.37	53429	98.6	53145	98.08	52682	97.22	51884	95.75
23028804D	53856	99.39	53379	98.51	52990	97.79	52234	96.39	50867	93.87
23028820D	53810	99.3	53261	98.29	52732	97.31	51872	95.73	50203	92.65
23028821D	53779	99.25	53298	98.36	52820	97.48	52065	96.08	50760	93.67
23028822D	53876	99.42	53396	98.54	52991	97.79	52324	96.56	51300	94.67
23028823D	53774	99.24	53218	98.21	52563	97	51341	94.75	49071	90.56
23028824D	53942	99.55	53481	98.7	53066	97.93	52546	96.97	51661	95.34
23028825D	53888	99.45	53393	98.53	52989	97.79	52354	96.62	51291	94.65
23028826D	53856	99.39	53465	98.67	53176	98.13	52773	97.39	52193	96.32
23028827D	53788	99.26	53303	98.37	52825	97.48	51990	95.94	50616	93.41
23028828D	53885	99.44	53408	98.56	53068	97.93	52603	97.07	51922	95.82
23028829D	53821	99.32	53440	98.62	53164	98.11	52754	97.35	52176	96.29
23028830D	53850	99.38	53444	98.63	53155	98.09	52742	97.33	52145	96.23
23028831D	53850	99.38	53396	98.54	52948	97.71	52286	96.49	51249	94.58
23028832D	53837	99.35	53370	98.49	52928	97.67	52233	96.39	50933	93.99
23028833D	53906	99.48	53481	98.7	53194	98.17	52775	97.39	52182	96.3
23028834D	53862	99.4	53423	98.59	53111	98.01	52592	97.05	51657	95.33
23028835D	53798	99.28	53172	98.13	52180	96.29	50026	92.32	45841	84.6
23028836D	54031	99.71	53686	99.07	53537	98.8	53438	98.62	53307	98.37
23028837D	54034	99.72	53733	99.16	53609	98.93	53507	98.74	53408	98.56
23028838D	53943	99.55	53657	99.02	53546	98.82	53435	98.61	53339	98.43
23028839D	53999	99.65	53712	99.12	53616	98.94	53536	98.8	53460	98.66
23028840D	54074	99.79	53760	99.21	53643	98.99	53549	98.82	53459	98.65
23028841D	54073	99.79	53727	99.15	53590	98.9	53489	98.71	53403	98.55
23028842D	54037	99.72	53768	99.22	53664	99.03	53611	98.94	53551	98.82
23028843D	54041	99.73	53756	99.2	53626	98.96	53522	98.77	53426	98.59
23028844D	54022	99.69	53704	99.11	53583	98.88	53479	98.69	53372	98.49
23028845D	53930	99.52	53604	98.92	53441	98.62	53284	98.33	53135	98.06
23028846D	53997	99.65	53689	99.08	53551	98.82	53439	98.62	53334	98.42
23028847D	54046	99.74	53715	99.13	53586	98.89	53488	98.71	53396	98.54
23028848D	54045	99.74	53737	99.17	53621	98.95	53534	98.79	53444	98.63
23028849D	54055	99.75	53736	99.17	53556	98.83	53447	98.63	53329	98.41
23028850D	54085	99.81	53787	99.26	53636	98.98	53541	98.81	53462	98.66
