# Supplementary material for: Development and Validation of a 54K Genome-Wide Liquid SNP Chip Panel by Target Sequencing for Dairy Goat
Source: Genes (Basel). 2023 May 22;14(5):1122. doi: 10.3390/genes14051122 (PMC10218471; doi:10.3390/genes14051122)
Supplement: Supplementary file 1 [file genes-14-01122-s001.zip › Supplementary_TableS3.xlsx]

## Sheet: Table S7
Table S3 Average read depth around the 54K sites for probe design.
Distance to the target sites(bp)	Depth
-500	16.6973
-499	16.2467
-498	16.2421
-497	16.26
-496	16.3231
-495	16.2893
-494	16.3007
-493	16.3061
-492	16.2888
-491	16.3597
-490	16.4562
-489	16.3996
-488	16.3773
-487	16.3806
-486	16.3346
-485	16.4238
-484	16.3742
-483	16.4102
-482	16.3844
-481	16.3929
-480	16.481
-479	16.5118
-478	16.4936
-477	16.4976
-476	16.4815
-475	16.4473
-474	16.5194
-473	16.4801
-472	16.498
-471	16.4661
-470	16.5496
-469	16.5235
-468	16.6108
-467	16.6611
-466	16.5967
-465	16.5759
-464	16.5693
-463	16.6317
-462	16.591
-461	16.5557
-460	16.6308
-459	16.6324
-458	16.6863
-457	16.7506
-456	16.7281
-455	16.7161
-454	16.6844
-453	16.6905
-452	16.7062
-451	16.7492
-450	16.6899
-449	16.7294
-448	16.75
-447	16.7911
-446	16.8743
-445	16.9246
-444	16.8954
-443	16.871
-442	16.7966
-441	16.8912
-440	16.8628
-439	16.8606
-438	16.8417
-437	16.9038
-436	16.9474
-435	16.9676
-434	17.0562
-433	17.0511
-432	16.9815
-431	17.0119
-430	17.026
-429	17.0431
-428	17.034
-427	17.0514
-426	17.0599
-425	17.086
-424	17.1618
-423	17.2408
-422	17.2709
-421	17.2121
-420	17.2262
-419	17.2149
-418	17.2388
-417	17.2599
-416	17.235
-415	17.2665
-414	17.3271
-413	17.3606
-412	17.4477
-411	17.5257
-410	17.4414
-409	17.4173
-408	17.3941
-407	17.4713
-406	17.4187
-405	17.4768
-404	17.4772
-403	17.4997
-402	17.5909
-401	17.6887
-400	17.7246
-399	17.6797
-398	17.6399
-397	17.6255
-396	17.725
-395	17.7006
-394	17.6959
-393	17.7424
-392	17.7569
-391	17.8972
-390	17.9539
-389	17.9736
-388	17.9665
-387	17.9452
-386	17.9582
-385	17.9341
-384	18.0084
-383	18.0564
-382	18.0041
-381	18.0131
-380	18.2033
-379	18.289
-378	18.2784
-377	18.2904
-376	18.2624
-375	18.2555
-374	18.3214
-373	18.2649
-372	18.3895
-371	18.3842
-370	18.4013
-369	18.499
-368	18.5393
-367	18.6543
-366	18.6706
-365	18.6257
-364	18.6104
-363	18.7055
-362	18.65
-361	18.7049
-360	18.7493
-359	18.8109
-358	18.8372
-357	18.9155
-356	19.0758
-355	19.0859
-354	18.9625
-353	19.0242
-352	19.1159
-351	19.0631
-350	19.0837
-349	19.1526
-348	19.2273
-347	19.3047
-346	19.3238
-345	19.4978
-344	19.5227
-343	19.3753
-342	19.4945
-341	19.494
-340	19.5245
-339	19.5467
-338	19.5835
-337	19.7096
-336	19.7409
-335	19.7955
-334	19.9962
-333	20.0664
-332	19.918
-331	19.9874
-330	20.0259
-329	19.9979
-328	20.0646
-327	20.1125
-326	20.2553
-325	20.2783
-324	20.3248
-323	20.5448
-322	20.6116
-321	20.4935
-320	20.5545
-319	20.6334
-318	20.5772
-317	20.6546
-316	20.7186
-315	20.8117
-314	20.8981
-313	20.9317
-312	21.1005
-311	21.248
-310	21.214
-309	21.1855
-308	21.2499
-307	21.274
-306	21.3094
-305	21.3916
-304	21.4791
-303	21.5971
-302	21.6311
-301	21.8354
-300	21.9399
-299	21.9519
-298	21.9183
-297	21.9447
-296	22.0029
-295	21.9796
-294	22.1749
-293	22.2083
-292	22.2648
-291	22.402
-290	22.5345
-289	22.7507
-288	22.749
-287	22.7228
-286	22.7857
-285	22.8123
-284	22.8483
-283	23.0149
-282	23.0384
-281	23.1574
-280	23.2639
-279	23.3869
-278	23.6213
-277	23.6453
-276	23.6515
-275	23.7316
-274	23.7444
-273	23.8043
-272	23.9413
-271	24.0376
-270	24.1065
-269	24.293
-268	24.3889
-267	24.6945
-266	24.6736
-265	24.7089
-264	24.7694
-263	24.8343
-262	24.9135
-261	25.0407
-260	25.1665
-259	25.2398
-258	25.4315
-257	25.5533
-256	25.8376
-255	25.9141
-254	25.9862
-253	25.9918
-252	26.0785
-251	26.1183
-250	26.3225
-249	26.4715
-248	26.5756
-247	26.712
-246	26.8337
-245	27.2065
-244	27.3534
-243	27.3445
-242	27.3676
-241	27.5016
-240	27.5456
-239	27.7349
-238	27.9007
-237	28.0356
-236	28.2333
-235	28.3719
-234	28.6772
-233	28.9176
-232	28.9016
-231	28.9824
-230	29.1128
-229	29.1938
-228	29.4003
-227	29.5364
-226	29.7518
-225	29.8889
-224	30.099
-223	30.4205
-222	30.8236
-221	30.6946
-220	30.8027
-219	30.9233
-218	31.0767
-217	31.2157
-216	31.4044
-215	31.6291
-214	31.8008
-213	32.0066
-212	32.3604
-211	32.7058
-210	32.7282
-209	32.7763
-208	32.9698
-207	33.0934
-206	33.261
-205	33.4642
-204	33.6668
-203	33.9261
-202	34.1056
-201	34.4546
-200	34.8898
-199	34.8844
-198	34.9602
-197	35.1356
-196	35.2844
-195	35.4594
-194	35.6186
-193	35.8652
-192	36.0904
-191	36.3315
-190	36.6619
-189	37.0693
-188	37.1806
-187	37.1891
-186	37.379
-185	37.4944
-184	37.6669
-183	37.8815
-182	38.1198
-181	38.2637
-180	38.5858
-179	38.8501
-178	39.3519
-177	39.4681
-176	39.4711
-175	39.6375
-174	39.8232
-173	40.0011
-172	40.1506
-171	40.402
-170	40.5939
-169	40.9473
-168	41.2298
-167	41.7141
-166	41.9117
-165	41.9299
-164	42.1116
-163	42.3462
-162	42.5037
-161	42.6971
-160	43.0244
-159	43.1737
-158	43.5373
-157	43.8688
-156	44.3843
-155	44.6407
-154	44.6421
-153	44.819
-152	45.0999
-151	45.3146
-150	45.5752
-149	45.8667
-148	46.1472
-147	46.4789
-146	46.8293
-145	47.3846
-144	47.7717
-143	47.7615
-142	47.899
-141	48.2154
-140	48.4043
-139	48.7159
-138	49.0047
-137	49.2862
-136	49.6518
-135	49.9708
-134	50.6548
-133	51.0939
-132	51.091
-131	51.2041
-130	51.5389
-129	51.8049
-128	52.117
-127	52.389
-126	52.7648
-125	53.1166
-124	53.4622
-123	54.1085
-122	54.7093
-121	54.6993
-120	54.8098
-119	55.1871
-118	55.4547
-117	55.8514
-116	56.0851
-115	56.5552
-114	56.8342
-113	57.2699
-112	57.8744
-111	58.7602
-110	58.6398
-109	58.7144
-108	59.1
-107	59.4216
-106	59.831
-105	60.087
-104	60.5444
-103	60.9277
-102	61.3858
-101	62.0443
-100	62.8867
-99	62.8576
-98	62.9977
-97	63.3911
-96	63.698
-95	64.1337
-94	64.4037
-93	64.9092
-92	65.2554
-91	65.7499
-90	66.3354
-89	67.2765
-88	67.3858
-87	67.429
-86	67.7608
-85	68.1462
-84	68.5627
-83	68.8266
-82	69.3152
-81	69.6949
-80	70.214
-79	70.7127
-78	71.7068
-77	71.8721
-76	71.774
-75	72.1277
-74	72.478
-73	72.8655
-72	73.1731
-71	73.5562
-70	73.9156
-69	74.3838
-68	74.9186
-67	75.8384
-66	76.1472
-65	75.8875
-64	76.229
-63	76.5792
-62	76.8993
-61	77.2139
-60	77.5059
-59	77.9266
-58	78.2946
-57	78.7856
-56	79.6282
-55	80.1099
-54	79.6537
-53	79.9201
-52	80.2749
-51	80.5479
-50	80.7504
-49	81.0511
-48	81.3727
-47	81.6937
-46	82.1048
-45	82.8469
-44	83.5131
-43	82.8044
-42	83.0603
-41	83.3009
-40	83.5446
-39	83.6518
-38	83.9127
-37	84.1776
-36	84.4702
-35	84.7578
-34	85.407
-33	86.3092
-32	85.3562
-31	85.5059
-30	85.7635
-29	85.9253
-28	86.0219
-27	86.1894
-26	86.4549
-25	86.5752
-24	86.8517
-23	87.3711
-22	88.5327
-21	87.2925
-20	87.4218
-19	87.5524
-18	87.7221
-17	87.763
-16	87.8655
-15	88.056
-14	88.1241
-13	88.2854
-12	88.5858
-11	90.0419
-10	88.5157
-9	88.6276
-8	88.5914
-7	88.7408
-6	88.6745
-5	88.6534
-4	88.7751
-3	88.7907
-2	88.8169
-1	88.8536
0	91.1286
1	88.8536
2	88.8169
3	88.7907
4	88.7751
5	88.6534
6	88.6745
7	88.7408
8	88.5914
9	88.6276
10	88.5157
11	90.0419
12	88.5858
13	88.2854
14	88.1241
15	88.056
16	87.8655
17	87.763
18	87.7221
19	87.5524
20	87.4218
21	87.2925
22	88.5327
23	87.3711
24	86.8517
25	86.5752
26	86.4549
27	86.1894
28	86.0219
29	85.9253
30	85.7635
31	85.5059
32	85.3562
33	86.3092
34	85.407
35	84.7578
36	84.4702
37	84.1776
38	83.9127
39	83.6518
40	83.5446
41	83.3009
42	83.0603
43	82.8044
44	83.5131
45	82.8469
46	82.1048
47	81.6937
48	81.3727
49	81.0511
50	80.7504
51	80.5479
52	80.2749
53	79.9201
54	79.6537
55	80.1099
56	79.6282
57	78.7856
58	78.2946
59	77.9266
60	77.5059
61	77.2139
62	76.8993
63	76.5792
64	76.229
65	75.8875
66	76.1472
67	75.8384
68	74.9186
69	74.3838
70	73.9156
71	73.5562
72	73.1731
73	72.8655
74	72.478
75	72.1277
76	71.774
77	71.8721
78	71.7068
79	70.7127
80	70.214
81	69.6949
82	69.3152
83	68.8266
84	68.5627
85	68.1462
86	67.7608
87	67.429
88	67.3858
89	67.2765
90	66.3354
91	65.7499
92	65.2554
93	64.9092
94	64.4037
95	64.1337
96	63.698
97	63.3911
98	62.9977
99	62.8576
100	62.8867
101	62.0443
102	61.3858
103	60.9277
104	60.5444
105	60.087
106	59.831
107	59.4216
108	59.1
109	58.7144
110	58.6398
111	58.7602
112	57.8744
113	57.2699
114	56.8342
115	56.5552
116	56.0851
117	55.8514
118	55.4547
119	55.1871
120	54.8098
121	54.6993
122	54.7093
123	54.1085
124	53.4622
125	53.1166
126	52.7648
127	52.389
128	52.117
129	51.8049
130	51.5389
131	51.2041
132	51.091
133	51.0939
134	50.6548
135	49.9708
136	49.6518
137	49.2862
138	49.0047
139	48.7159
140	48.4043
141	48.2154
142	47.899
143	47.7615
144	47.7717
145	47.3846
146	46.8293
147	46.4789
148	46.1472
149	45.8667
150	45.5752
151	45.3146
152	45.0999
153	44.819
154	44.6421
155	44.6407
156	44.3843
157	43.8688
158	43.5373
159	43.1737
160	43.0244
161	42.6971
162	42.5037
163	42.3462
164	42.1116
165	41.9299
166	41.9117
167	41.7141
168	41.2298
169	40.9473
170	40.5939
171	40.402
172	40.1506
173	40.0011
174	39.8232
175	39.6375
176	39.4711
177	39.4681
178	39.3519
179	38.8501
180	38.5858
181	38.2637
182	38.1198
183	37.8815
184	37.6669
185	37.4944
186	37.379
187	37.1891
188	37.1806
189	37.0693
190	36.6619
191	36.3315
192	36.0904
193	35.8652
194	35.6186
195	35.4594
196	35.2844
197	35.1356
198	34.9602
199	34.8844
200	34.8898
201	34.4546
202	34.1056
203	33.9261
204	33.6668
205	33.4642
206	33.261
207	33.0934
208	32.9698
209	32.7763
210	32.7282
211	32.7058
212	32.3604
213	32.0066
214	31.8008
215	31.6291
216	31.4044
217	31.2157
218	31.0767
219	30.9233
220	30.8027
221	30.6946
222	30.8236
223	30.4205
224	30.099
225	29.8889
226	29.7518
227	29.5364
228	29.4003
229	29.1938
230	29.1128
231	28.9824
232	28.9016
233	28.9176
234	28.6772
235	28.3719
236	28.2333
237	28.0356
238	27.9007
239	27.7349
240	27.5456
241	27.5016
242	27.3676
243	27.3445
244	27.3534
245	27.2065
246	26.8337
247	26.712
248	26.5756
249	26.4715
250	26.3225
251	26.1183
252	26.0785
253	25.9918
254	25.9862
255	25.9141
256	25.8376
257	25.5533
258	25.4315
259	25.2398
260	25.1665
261	25.0407
262	24.9135
263	24.8343
264	24.7694
265	24.7089
266	24.6736
267	24.6945
268	24.3889
269	24.293
270	24.1065
271	24.0376
272	23.9413
273	23.8043
274	23.7444
275	23.7316
276	23.6515
277	23.6453
278	23.6213
279	23.3869
280	23.2639
281	23.1574
282	23.0384
283	23.0149
284	22.8483
285	22.8123
286	22.7857
287	22.7228
288	22.749
289	22.7507
290	22.5345
291	22.402
292	22.2648
293	22.2083
294	22.1749
295	21.9796
296	22.0029
297	21.9447
298	21.9183
299	21.9519
300	21.9399
301	21.8354
302	21.6311
303	21.5971
304	21.4791
305	21.3916
306	21.3094
307	21.274
308	21.2499
309	21.1855
310	21.214
311	21.248
312	21.1005
313	20.9317
314	20.8981
315	20.8117
316	20.7186
317	20.6546
318	20.5772
319	20.6334
320	20.5545
321	20.4935
322	20.6116
323	20.5448
324	20.3248
325	20.2783
326	20.2553
327	20.1125
328	20.0646
329	19.9979
330	20.0259
331	19.9874
332	19.918
333	20.0664
334	19.9962
335	19.7955
336	19.7409
337	19.7096
338	19.5835
339	19.5467
340	19.5245
341	19.494
342	19.4945
343	19.3753
344	19.5227
345	19.4978
346	19.3238
347	19.3047
348	19.2273
349	19.1526
350	19.0837
351	19.0631
352	19.1159
353	19.0242
354	18.9625
355	19.0859
356	19.0758
357	18.9155
358	18.8372
359	18.8109
360	18.7493
361	18.7049
362	18.65
363	18.7055
364	18.6104
365	18.6257
366	18.6706
367	18.6543
368	18.5393
369	18.499
370	18.4013
371	18.3842
372	18.3895
373	18.2649
374	18.3214
375	18.2555
376	18.2624
377	18.2904
378	18.2784
379	18.289
380	18.2033
381	18.0131
382	18.0041
383	18.0564
384	18.0084
385	17.9341
386	17.9582
387	17.9452
388	17.9665
389	17.9736
390	17.9539
391	17.8972
392	17.7569
393	17.7424
394	17.6959
395	17.7006
396	17.725
397	17.6255
398	17.6399
399	17.6797
400	17.7246
401	17.6887
402	17.5909
403	17.4997
404	17.4772
405	17.4768
406	17.4187
407	17.4713
408	17.3941
409	17.4173
410	17.4414
411	17.5257
412	17.4477
413	17.3606
414	17.3271
415	17.2665
416	17.235
417	17.2599
418	17.2388
419	17.2149
420	17.2262
421	17.2121
422	17.2709
423	17.2408
424	17.1618
425	17.086
426	17.0599
427	17.0514
428	17.034
429	17.0431
430	17.026
431	17.0119
432	16.9815
433	17.0511
434	17.0562
435	16.9676
436	16.9474
437	16.9038
438	16.8417
439	16.8606
440	16.8628
441	16.8912
442	16.7966
443	16.871
444	16.8954
445	16.9246
446	16.8743
447	16.7911
448	16.75
449	16.7294
450	16.6899
451	16.7492
452	16.7062
453	16.6905
454	16.6844
455	16.7161
456	16.7281
457	16.7506
458	16.6863
459	16.6324
460	16.6308
461	16.5557
462	16.591
463	16.6317
464	16.5693
465	16.5759
466	16.5967
467	16.6611
468	16.6108
469	16.5235
470	16.5496
471	16.4661
472	16.498
473	16.4801
474	16.5194
475	16.4473
476	16.4815
477	16.4976
478	16.4936
479	16.5118
480	16.481
481	16.3929
482	16.3844
483	16.4102
484	16.3742
485	16.4238
486	16.3346
487	16.3806
488	16.3773
489	16.3996
490	16.4562
491	16.3597
492	16.2888
493	16.3061
494	16.3007
495	16.2893
496	16.3231
497	16.26
498	16.2421
499	16.2467
500	16.6973
